# Supplementary material for: Nutrient Imbalance of the Host Plant for Larvae of the Pale Grass Blue Butterfly May Mediate the Field Effect of Low-Dose Radiation Exposure in Fukushima: Dose-Dependent Changes in the Sodium Content
Source: MDPI journal article supplement (doi:10.3390/insects12020149), 2021-02-09
Supplement: s1 [file s1]

**Table S1. Sampling information and environmental data.**

| Group   | Prefecture | City/Town     | Sampling date | Temperature [°C] | Ground dose [ $\mu\text{Sv/h}$ ] |
|---------|------------|---------------|---------------|------------------|----------------------------------|
| Tohoku  | Yamagata   | Yamagata      | 2016/11/26    | 8.1              | 0.0880                           |
|         | Miyagi     | Sendai-1      | 2016/11/26    | 9.7              | 0.0400                           |
|         |            | Sendai-2      | 2020/7/11     | 22.2             | 0.0760                           |
|         | Fukushima  | Ryozen        | 2016/11/27    | 8.1              | 0.3960                           |
|         |            | Tomioka-1     | 2016/11/28    | 10.9             | 0.4680                           |
|         |            | Iwaki-1       | 2016/11/28    | 11.8             | 0.1320                           |
|         |            | Minamisoma    | 2020/7/11     | 25.7             | 0.4050                           |
|         |            | Namie-1       | 2020/7/11     | 25.7             | 2.6060                           |
|         |            | Soma          | 2020/7/12     | 19.1             | 0.2533                           |
|         |            | Iitate-1      | 2020/7/12     | 17.2             | 2.3960                           |
|         |            | Iitate-2      | 2020/7/12     | 17.6             | 1.5650                           |
|         |            | Namie-2       | 2020/7/13     | 25.7             | 3.4757                           |
|         |            | Tomioka-2     | 2020/7/13     | 19.4             | 1.1225                           |
|         |            | Iwaki-2       | 2020/7/13     | 19.7             | 0.1500                           |
| Niigata | Niigata    | Joetsu        | 2018/7/28     | 30.5             | 0.0433                           |
|         |            | Kashiwazaki   | 2018/7/28     | 35.0             | 0.0300                           |
|         |            | Murakami      | 2018/7/29     | 36.4             | 0.0700                           |
|         |            | Niigata       | 2018/7/30     | 32.8             | 0.0533                           |
|         |            | Yahiko        | 2018/7/30     | 30.3             | 0.0400                           |
| Kyushu  | Kagoshima  | Satsumasendai | 2016/12/3     | 17.2             | 0.0520                           |
|         |            | Izumi         | 2016/12/4     | 13.7             | 0.0600                           |
|         | Kumamoto   | Kumamoto      | 2016/12/4     | 11.0             | 0.0380                           |
|         |            | Yatsushiro    | 2016/12/5     | 13.5             | 0.0540                           |
|         | Okinawa    | Nishihara-AM  | 2016/12/10    | 21.3             | -                                |
|         |            | Nishihara-PM  | 2016/12/10    | 22.6             | 0.0460                           |

Note: Ground dose was calculated as the mean value of 3 to 7 spots. -: Not applicable.

**Table S2. Nutrient contents and <sup>40</sup>K and <sup>137</sup>Cs radioactivity concentrations in *Oxalis* leaves in the Tohoku group.**

| City/Town  | Replication,<br>mean ± SD ( <i>n</i> ) | Nutrient contents and radioactivity concentrations |                |                |                |                 |                |                |              |               |
|------------|----------------------------------------|----------------------------------------------------|----------------|----------------|----------------|-----------------|----------------|----------------|--------------|---------------|
|            |                                        | EN<br>[kcal/100g]                                  | PR<br>[g/100g] | LI<br>[g/100g] | CA<br>[g/100g] | Na<br>[mg/100g] | WA<br>[g/100g] | AS<br>[g/100g] | K<br>[Bq/kg] | Cs<br>[Bq/kg] |
| Yamagata   | 1                                      | 65                                                 | 4.0            | 1.2            | 9.6            | 10              | 83.7           | 1.5            | 1190.95      | 9.97          |
|            | 2                                      | 66                                                 | 4.2            | 1.2            | 9.5            | 10              | 83.5           | 1.6            | -            | -             |
|            | 3                                      | 66                                                 | 4.3            | 1.2            | 9.5            | 11              | 83.5           | 1.5            | -            | -             |
|            | Mean                                   | 65.67                                              | 4.167          | 1.200          | 9.533          | 10.33           | 83.567         | 1.533          | -            | -             |
|            | ± SD ( <i>n</i> = 3)                   | ± 0.47                                             | ± 0.125        | ± 0            | ± 0.047        | ± 0.47          | ± 0.094        | ± 0.047        | -            | -             |
| Sendai-1   | 1                                      | 72                                                 | 3.7            | 1.2            | 11.7           | 9               | 82.0           | 1.4            | 719.66       | ND            |
|            | 2                                      | 72                                                 | 3.9            | 1.1            | 11.5           | 9               | 82.1           | 1.4            | -            | -             |
|            | 3                                      | 72                                                 | 3.8            | 1.1            | 11.6           | 9               | 82.1           | 1.4            | -            | -             |
|            | Mean                                   | 72.00                                              | 3.800          | 1.133          | 11.600         | 9.00            | 82.067         | 1.400          | -            | -             |
|            | ± SD ( <i>n</i> = 3)                   | ± 0                                                | ± 0.082        | ± 0.047        | ± 0.082        | ± 0             | ± 0.047        | ± 0            | -            | -             |
| Sendai-2   | 1                                      | 60                                                 | 3.9            | 0.8            | 9.9            | 4               | 84.2           | 1.1            | 819.12       | 8.41          |
|            | 2                                      | 62                                                 | 3.8            | 0.8            | 9.8            | 4               | 84.5           | 1.1            | -            | -             |
|            | 3                                      | 63                                                 | 3.8            | 0.9            | 9.4            | 4               | 84.9           | 1.1            | -            | -             |
|            | Mean                                   | 61.67                                              | 3.833          | 0.833          | 9.700          | 4.00            | 84.533         | 1.100          | -            | -             |
|            | ± SD ( <i>n</i> = 3)                   | ± 1.25                                             | ± 0.047        | ± 0.047        | ± 0.216        | ± 0             | ± 0.287        | ± 0            | -            | -             |
| Ryozen     | 1                                      | 75                                                 | 4.2            | 1.3            | 11.7           | 4               | 81.6           | 1.2            | 653.99       | 66.16         |
|            | 2                                      | 76                                                 | 4.2            | 1.2            | 12.0           | 5               | 81.4           | 1.2            | -            | -             |
|            | 3                                      | 77                                                 | 4.3            | 1.3            | 11.9           | 4               | 81.3           | 1.2            | -            | -             |
|            | Mean                                   | 76.00                                              | 4.233          | 1.267          | 11.867         | 4.33            | 81.433         | 1.200          | -            | -             |
|            | ± SD ( <i>n</i> = 3)                   | ± 0.82                                             | ± 0.047        | ± 0.047        | ± 0.125        | ± 0.47          | ± 0.125        | ± 0            | -            | -             |
| Tomioka-1  | 1                                      | 61                                                 | 3.2            | 1.0            | 9.7            | 7               | 84.6           | 1.5            | 879.29       | 564.49        |
|            | 2                                      | 60                                                 | 3.2            | 1.0            | 9.5            | 7               | 84.8           | 1.5            | -            | -             |
|            | 3                                      | 60                                                 | 3.3            | 0.9            | 9.6            | 7               | 84.7           | 1.5            | -            | -             |
|            | Mean                                   | 60.33                                              | 3.233          | 0.967          | 9.600          | 7.00            | 84.700         | 1.500          | -            | -             |
|            | ± SD ( <i>n</i> = 3)                   | ± 0.47                                             | ± 0.047        | ± 0.047        | ± 0.082        | ± 0             | ± 0.082        | ± 0            | -            | -             |
| Iwaki-1    | 1                                      | 61                                                 | 3.8            | 1.3            | 8.6            | 8               | 84.9           | 1.4            | 852.81       | 17.38         |
|            | 2                                      | 60                                                 | 3.9            | 1.2            | 8.5            | 8               | 85.0           | 1.4            | -            | -             |
|            | 3                                      | 60                                                 | 3.9            | 1.1            | 8.6            | 8               | 85.0           | 1.4            | -            | -             |
|            | Mean                                   | 60.33                                              | 3.867          | 1.200          | 8.567          | 8.00            | 84.967         | 1.400          | -            | -             |
|            | ± SD ( <i>n</i> = 3)                   | ± 0.47                                             | ± 0.047        | ± 0.082        | ± 0.047        | ± 0             | ± 0.047        | ± 0            | -            | -             |
| Minamisoma | 1                                      | 59                                                 | 3.2            | 1.0            | 9.2            | 3               | 85.7           | 1.0            | 691.00       | 28.90         |
|            | 2                                      | 58                                                 | 3.2            | 0.9            | 9.2            | 3               | 85.7           | 1.0            | -            | -             |
|            | 3                                      | 58                                                 | 3.2            | 0.9            | 9.2            | 3               | 85.6           | 1.0            | -            | -             |
|            | Mean                                   | 58.33                                              | 3.200          | 0.933          | 9.200          | 3.00            | 85.667         | 1.000          | -            | -             |
|            | ± SD ( <i>n</i> = 3)                   | ± 0.47                                             | ± 0            | ± 0.047        | ± 0            | ± 0             | ± 0.047        | ± 0            | -            | -             |
| Namie-1    | 1                                      | 59                                                 | 3.6            | 1.0            | 9.0            | 4               | 85.2           | 1.1            | 860.58       | 328.06        |
|            | 2                                      | 59                                                 | 3.6            | 1.0            | 8.8            | 4               | 85.5           | 1.1            | -            | -             |
|            | 3                                      | 59                                                 | 3.6            | 1.0            | 9.0            | 4               | 85.3           | 1.2            | -            | -             |
|            | Mean                                   | 59.00                                              | 3.600          | 1.000          | 8.933          | 4.00            | 85.333         | 1.133          | -            | -             |
|            | ± SD ( <i>n</i> = 3)                   | ± 0                                                | ± 0            | ± 0            | ± 0.094        | ± 0             | ± 0.125        | ± 0.047        | -            | -             |

Table S2. Continued.

| City/Town | Replication,<br>mean ± SD ( <i>n</i> ) | Nutrient contents and radioactivity concentrations |                |                |                |                 |                |                |              |               |
|-----------|----------------------------------------|----------------------------------------------------|----------------|----------------|----------------|-----------------|----------------|----------------|--------------|---------------|
|           |                                        | EN<br>[kcal/100g]                                  | PR<br>[g/100g] | LI<br>[g/100g] | CA<br>[g/100g] | Na<br>[mg/100g] | WA<br>[g/100g] | AS<br>[g/100g] | K<br>[Bq/kg] | Cs<br>[Bq/kg] |
| Soma      | 1                                      | 55                                                 | 3.3            | 0.9            | 8.6            | 3               | 86.1           | 1.1            | 550.98       | 39.19         |
|           | 2                                      | 55                                                 | 3.3            | 0.9            | 8.3            | 3               | 86.4           | 1.1            | -            | -             |
|           | 3                                      | 56                                                 | 3.3            | 0.9            | 8.5            | 3               | 86.2           | 1.1            | -            | -             |
|           | Mean                                   | 55.33                                              | 3.300          | 0.900          | 8.467          | 3.00            | 86.233         | 1.100          | -            | -             |
|           | ± SD ( <i>n</i> = 3)                   | ± 0.47                                             | ± 0            | ± 0            | ± 0.125        | ± 0             | ± 0.125        | ± 0            | -            | -             |
| Iitate-1  | 1                                      | 60                                                 | 3.0            | 0.8            | 10.1           | 1               | 85.1           | 0.9            | 719.69       | 257.78        |
|           | 2                                      | 61                                                 | 2.9            | 0.9            | 10.4           | 1               | 84.9           | 0.9            | -            | -             |
|           | 3                                      | 61                                                 | 2.9            | 0.9            | 10.2           | 2               | 85.2           | 0.9            | -            | -             |
|           | Mean                                   | 60.67                                              | 2.933          | 0.867          | 10.233         | 1.33            | 85.067         | 0.900          | -            | -             |
|           | ± SD ( <i>n</i> = 3)                   | ± 0.47                                             | ± 0.047        | ± 0.047        | ± 0.125        | ± 0.47          | ± 0.125        | ± 0            | -            | -             |
| Iitate-2  | 1                                      | 61                                                 | 3.5            | 0.8            | 9.7            | 2               | 84.9           | 1.0            | 511.17       | 300.37        |
|           | 2                                      | 61                                                 | 3.6            | 0.8            | 9.8            | 1               | 84.8           | 1.0            | -            | -             |
|           | 3                                      | 61                                                 | 3.6            | 0.9            | 9.8            | 1               | 84.8           | 1.0            | -            | -             |
|           | Mean                                   | 61.00                                              | 3.567          | 0.833          | 9.767          | 1.33            | 84.833         | 1.000          | -            | -             |
|           | ± SD ( <i>n</i> = 3)                   | ± 0                                                | ± 0.047        | ± 0.047        | ± 0.047        | ± 0.47          | ± 0.047        | ± 0            | -            | -             |
| Namic-2   | 1                                      | 57                                                 | 3.6            | 1.0            | 9.0            | 3               | 85.2           | 1.3            | 617.14       | 211.32        |
|           | 2                                      | 59                                                 | 3.6            | 0.9            | 9.0            | 3               | 85.3           | 1.2            | -            | -             |
|           | 3                                      | 59                                                 | 3.6            | 1.0            | 8.4            | 3               | 85.7           | 1.2            | -            | -             |
|           | Mean                                   | 58.33                                              | 3.600          | 0.967          | 8.800          | 3.00            | 85.400         | 1.233          | -            | -             |
|           | ± SD ( <i>n</i> = 3)                   | ± 0.94                                             | ± 0            | ± 0.047        | ± 0.283        | ± 0             | ± 0.216        | ± 0.047        | -            | -             |
| Tomioka-2 | 1                                      | 62                                                 | 3.5            | 1.0            | 9.7            | 3               | 84.4           | 1.4            | 580.89       | 198.08        |
|           | 2                                      | 60                                                 | 3.4            | 0.8            | 9.8            | 3               | 84.5           | 1.5            | -            | -             |
|           | 3                                      | 61                                                 | 3.4            | 0.9            | 9.8            | 3               | 84.4           | 1.5            | -            | -             |
|           | Mean                                   | 61.00                                              | 3.433          | 0.900          | 9.767          | 3.00            | 84.433         | 1.467          | -            | -             |
|           | ± SD ( <i>n</i> = 3)                   | ± 0.82                                             | ± 0.047        | ± 0.082        | ± 0.047        | ± 0             | ± 0.047        | ± 0.047        | -            | -             |
| Iwaki-2   | 1                                      | 57                                                 | 3.5            | 0.9            | 8.8            | 7               | 85.8           | 1.0            | 757.34       | 15.56         |
|           | 2                                      | 57                                                 | 3.6            | 0.9            | 8.6            | 7               | 85.9           | 1.0            | -            | -             |
|           | 3                                      | 57                                                 | 3.5            | 0.9            | 8.7            | 7               | 85.9           | 1.0            | -            | -             |
|           | Mean                                   | 57.00                                              | 3.533          | 0.900          | 8.700          | 7.00            | 85.867         | 1.000          | -            | -             |
|           | ± SD ( <i>n</i> = 3)                   | ± 0                                                | ± 0.047        | ± 0            | ± 0.082        | ± 0             | ± 0.047        | ± 0            | -            | -             |

Note: EN: energy, PR: protein, LI: lipid, CA: carbohydrate, Na: sodium, WA: water, AS: ash, K: <sup>40</sup>K (potassium-40), Cs: <sup>137</sup>Cs (cesium-137). -: Not applicable, ND: Not determined (below detection limit). For mean and SD values, two digits after significant digits were saved just for reference.

**Table S3. Nutrient contents and <sup>40</sup>K and <sup>137</sup>Cs radioactivity concentrations in *Oxalis* leaves in the Niigata group.**

| City/Town   | Replication,<br>mean ± SD ( <i>n</i> ) | Nutrient contents and radioactivity concentrations |                |                |                |                 |                |                |              |               |
|-------------|----------------------------------------|----------------------------------------------------|----------------|----------------|----------------|-----------------|----------------|----------------|--------------|---------------|
|             |                                        | EN<br>[kcal/100g]                                  | PR<br>[g/100g] | LI<br>[g/100g] | CA<br>[g/100g] | Na<br>[mg/100g] | WA<br>[g/100g] | AS<br>[g/100g] | K<br>[Bq/kg] | Cs<br>[Bq/kg] |
| Joetsu      | 1                                      | 69                                                 | 3.7            | 1.0            | 11.4           | 11              | 82.5           | 1.4            | 908.18       | ND            |
|             | 2                                      | 70                                                 | 3.8            | 1.0            | 11.4           | 11              | 82.4           | 1.4            | -            | -             |
|             | Mean                                   | 69.50                                              | 3.750          | 1.000          | 11.400         | 11.00           | 82.450         | 1.400          | -            | -             |
|             | ± SD ( <i>n</i> = 2)                   | ± 0.50                                             | ± 0.050        | ± 0            | ± 0            | ± 0             | ± 0.050        | ± 0            |              |               |
| Kashiwazaki | 1                                      | 59                                                 | 3.7            | 1.0            | 8.8            | 12              | 85.2           | 1.3            | 899.00       | ND            |
|             | 2                                      | 60                                                 | 3.8            | 1.0            | 8.9            | 12              | 85.0           | 1.3            | -            | -             |
|             | Mean                                   | 59.50                                              | 3.750          | 1.000          | 8.850          | 12.00           | 85.100         | 1.300          | -            | -             |
|             | ± SD ( <i>n</i> = 2)                   | ± 0.50                                             | ± 0.050        | ± 0            | ± 0.050        | ± 0             | ± 0.100        | ± 0            |              |               |
| Murakami    | 1                                      | 67                                                 | 4.4            | 1.3            | 9.5            | 23              | 83.3           | 1.5            | 965.80       | ND            |
|             | 2                                      | 67                                                 | 4.0            | 1.3            | 9.9            | 23              | 83.3           | 1.5            | -            | -             |
|             | Mean                                   | 67.00                                              | 4.200          | 1.300          | 9.700          | 23.00           | 83.300         | 1.500          | -            | -             |
|             | ± SD ( <i>n</i> = 2)                   | ± 0                                                | ± 0.200        | ± 0            | ± 0.200        | ± 0             | ± 0            | ± 0            |              |               |
| Niigata     | 1                                      | 64                                                 | 3.9            | 1.2            | 9.4            | 18              | 84.1           | 1.4            | 961.16       | ND            |
|             | 2                                      | 62                                                 | 3.8            | 1.2            | 9.1            | 17              | 84.5           | 1.4            | -            | -             |
|             | Mean                                   | 63.00                                              | 3.850          | 1.200          | 9.250          | 17.50           | 84.300         | 1.400          | -            | -             |
|             | ± SD ( <i>n</i> = 2)                   | ± 1.00                                             | ± 0.050        | ± 0            | ± 0.150        | ± 0.50          | ± 0.200        | ± 0            |              |               |
| Yahiko      | 1                                      | 75                                                 | 4.1            | 1.5            | 11.2           | 32              | 81.6           | 1.6            | 927.00       | ND            |
|             | 2                                      | 75                                                 | 4.3            | 1.5            | 11.0           | 30              | 81.6           | 1.6            | -            | -             |
|             | Mean                                   | 75.00                                              | 4.200          | 1.500          | 11.100         | 31.00           | 81.600         | 1.600          | -            | -             |
|             | ± SD ( <i>n</i> = 2)                   | ± 0                                                | ± 0.100        | ± 0            | ± 0.100        | ± 1.00          | ± 0            | ± 0            |              |               |

Note: EN: energy, PR: protein, LI: lipid, CA: carbohydrate, Na: sodium, WA: water, AS: ash, K: <sup>40</sup>K (potassium-40), Cs: <sup>137</sup>Cs (cesium-137). -: Not applicable, ND: Not determined (below detection limit). For mean and SD values, two digits after significant digits were saved just for reference.

**Table S4. Nutrient contents and <sup>40</sup>K and <sup>137</sup>Cs radioactivity concentrations in *Oxalis* leaves in the Kyushu group.**

| City/Town     | Replication,<br>mean ± SD ( <i>n</i> ) | Nutrient contents and radioactivity concentrations |                |                |                |                 |                |                |              |               |
|---------------|----------------------------------------|----------------------------------------------------|----------------|----------------|----------------|-----------------|----------------|----------------|--------------|---------------|
|               |                                        | EN<br>[kcal/100g]                                  | PR<br>[g/100g] | LI<br>[g/100g] | CA<br>[g/100g] | Na<br>[mg/100g] | WA<br>[g/100g] | AS<br>[g/100g] | K<br>[Bq/kg] | Cs<br>[Bq/kg] |
| Satsumasendai | 1                                      | 72                                                 | 3.6            | 1.3            | 11.5           | 14              | 82.1           | 1.5            | 777.02       | ND            |
|               | 2                                      | 72                                                 | 3.6            | 1.3            | 11.4           | 14              | 82.2           | 1.5            | -            | -             |
|               | 3                                      | 72                                                 | 3.6            | 1.3            | 11.4           | 14              | 82.2           | 1.5            | -            | -             |
|               | Mean                                   | 72.00                                              | 3.600          | 1.300          | 11.433         | 14.00           | 82.167         | 1.500          | -            | -             |
|               | ± SD ( <i>n</i> = 3)                   | ± 0                                                | ± 0            | ± 0            | ± 0.047        | ± 0             | ± 0.047        | ± 0            | -            | -             |
| Izumi         | 1                                      | 62                                                 | 3.7            | 1.2            | 9.1            | 8               | 83.4           | 2.6            | 969.25       | ND            |
|               | 2                                      | 61                                                 | 3.8            | 1.1            | 8.9            | 8               | 83.6           | 2.6            | -            | -             |
|               | 3                                      | 61                                                 | 3.8            | 1.1            | 9.0            | 8               | 83.5           | 2.6            | -            | -             |
|               | Mean                                   | 61.33                                              | 3.767          | 1.133          | 9.000          | 8.00            | 83.500         | 2.600          | -            | -             |
|               | ± SD ( <i>n</i> = 3)                   | ± 0.47                                             | ± 0.047        | ± 0.047        | ± 0.082        | ± 0             | ± 0.082        | ± 0            | -            | -             |
| Kumamoto      | 1                                      | 54                                                 | 3.2            | 1.0            | 8.0            | 8               | 85.4           | 2.4            | 737.21       | ND            |
|               | 2                                      | 52                                                 | 3.3            | 1.0            | 7.5            | 8               | 85.8           | 2.4            | -            | -             |
|               | 3                                      | 53                                                 | 3.2            | 1.0            | 7.8            | 8               | 85.5           | 2.5            | -            | -             |
|               | Mean                                   | 53.00                                              | 3.233          | 1.000          | 7.767          | 8.00            | 85.567         | 2.433          | -            | -             |
|               | ± SD ( <i>n</i> = 3)                   | ± 0.82                                             | ± 0.047        | ± 0            | ± 0.205        | ± 0             | ± 0.170        | ± 0.047        | -            | -             |
| Yatsushiro    | 1                                      | 65                                                 | 3.5            | 1.1            | 10.3           | 8               | 83.6           | 1.5            | 840.27       | ND            |
|               | 2                                      | 66                                                 | 3.5            | 1.1            | 10.4           | 8               | 83.4           | 1.6            | -            | -             |
|               | 3                                      | 65                                                 | 3.5            | 1.0            | 10.6           | 9               | 83.3           | 1.6            | -            | -             |
|               | Mean                                   | 65.33                                              | 3.500          | 1.067          | 10.433         | 8.33            | 83.433         | 1.567          | -            | -             |
|               | ± SD ( <i>n</i> = 3)                   | ± 0.47                                             | ± 0            | ± 0.047        | ± 0.125        | ± 0.47          | ± 0.125        | ± 0.047        | -            | -             |
| Nishihara-AM  | 1                                      | 60                                                 | 3.6            | 1.1            | 8.8            | 13              | 85.0           | 1.5            | 931.66       | ND            |
|               | 2                                      | 60                                                 | 3.7            | 1.2            | 8.6            | 13              | 85.0           | 1.5            | -            | -             |
|               | 3                                      | 60                                                 | 3.6            | 1.1            | 9.0            | 13              | 84.8           | 1.5            | -            | -             |
| Nishihara-PM  | 1                                      | 67                                                 | 3.6            | 1.3            | 10.3           | 16              | 83.2           | 1.6            | -            | -             |
|               | 2                                      | 67                                                 | 3.7            | 1.3            | 10.2           | 16              | 83.2           | 1.6            | -            | -             |
|               | 3                                      | 67                                                 | 3.6            | 1.2            | 10.5           | 16              | 83.1           | 1.6            | -            | -             |
|               | Mean                                   | 63.50                                              | 3.633          | 1.200          | 9.567          | 14.50           | 84.050         | 1.540          | -            | -             |
|               | ± SD ( <i>n</i> = 6)                   | ± 3.50                                             | ± 0.047        | ± 0.082        | ± 0.780        | ± 1.50          | ± 0.886        | ± 0.050        | -            | -             |

Note: EN: energy, PR: protein, LI: lipid, CA: carbohydrate, Na: sodium, WA: water, AS: ash, K: <sup>40</sup>K (potassium-40), Cs: <sup>137</sup>Cs (cesium-137). -: Not applicable, ND: Not determined (below detection limit). For mean and SD values, two digits after significant digits were saved just for reference.

**Table S5. Pearson correlation coefficients and their associated  $p$ -values among nutrient contents,  $^{40}\text{K}$  and  $^{137}\text{Cs}$  radioactivity concentrations in *Oxalis* leaves, temperature, and ground radiation dose in 3 groups combined ( $n = 24$ ).**

|             | EN                                          | PR                                         | LI                                        | CA                                        | Na                            | WA                        | AS                         | K                           | Cs                                        | Temperature               |
|-------------|---------------------------------------------|--------------------------------------------|-------------------------------------------|-------------------------------------------|-------------------------------|---------------------------|----------------------------|-----------------------------|-------------------------------------------|---------------------------|
| PR          | $r = 0.65$<br>$p = 5.4 \times 10^{-4}***$   |                                            |                                           |                                           |                               |                           |                            |                             |                                           |                           |
| LI          | $r = 0.71$<br>$p = 9.9 \times 10^{-5}**$    | $r = 0.71$<br>$p = 1.1 \times 10^{-4}***$  |                                           |                                           |                               |                           |                            |                             |                                           |                           |
| CA          | $r = 0.92$<br>$p = 2.8 \times 10^{-10}*$    | $r = 0.35$<br>$p = 0.094$                  | $r = 0.41$<br>$p = 0.048*$                |                                           |                               |                           |                            |                             |                                           |                           |
| Na          | $r = 0.52$<br>$p = 0.0090**$                | $r = 0.59$<br>$p = 0.0026**$               | $r = 0.81$<br>$p = 1.3 \times 10^{-6}**$  | $r = 0.25$<br>$p = 0.23$                  |                               |                           |                            |                             |                                           |                           |
| WA          | $r = -0.97$<br>$p = 1.0 \times 10^{-14}***$ | $r = -0.64$<br>$p = 6.9 \times 10^{-4}***$ | $r = -0.72$<br>$p = 6.6 \times 10^{-5}**$ | $r = -0.87$<br>$p = 2.5 \times 10^{-8}**$ | $r = -0.53$<br>$p = 0.0072**$ |                           |                            |                             |                                           |                           |
| AS          | $r = 0.0050$<br>$p = 0.98$                  | $r = 0.13$<br>$p = 0.54$                   | $r = 0.37$<br>$p = 0.077$                 | $r = -0.16$<br>$p = 0.45$                 | $r = 0.31$<br>$p = 0.13$      | $r = -0.24$<br>$p = 0.26$ |                            |                             |                                           |                           |
| K           | $r = 0.24$<br>$p = 0.26$                    | $r = 0.49$<br>$p = 0.015*$                 | $r = 0.53$<br>$p = 0.0083**$              | $r = 0.0036$<br>$p = 0.99$                | $r = 0.59$<br>$p = 0.0023**$  | $r = -0.30$<br>$p = 0.16$ | $r = 0.38$<br>$p = 0.063$  |                             |                                           |                           |
| Cs          | $r = -0.26$<br>$p = 0.21$                   | $r = -0.44$<br>$p = 0.031*$                | $r = -0.42$<br>$p = 0.039*$               | $r = -0.086$<br>$p = 0.69$                | $r = -0.43$<br>$p = 0.038*$   | $r = 0.30$<br>$p = 0.15$  | $r = -0.27$<br>$p = 0.21$  | $r = -0.28$<br>$p = 0.18$   |                                           |                           |
| Temperature | $r = -0.021$<br>$p = 0.92$                  | $r = 0.17$<br>$p = 0.44$                   | $r = 0.071$<br>$p = 0.74$                 | $r = -0.093$<br>$p = 0.67$                | $r = 0.46$<br>$p = 0.022*$    | $r = 0.091$<br>$p = 0.67$ | $r = -0.23$<br>$p = 0.27$  | $r = 0.16$<br>$p = 0.46$    | $r = -0.16$<br>$p = 0.44$                 |                           |
| Ground dose | $r = -0.29$<br>$p = 0.16$                   | $r = -0.35$<br>$p = 0.099$                 | $r = -0.41$<br>$p = 0.049*$               | $r = -0.16$<br>$p = 0.47$                 | $r = -0.48$<br>$p = 0.018*$   | $r = 0.36$<br>$p = 0.080$ | $r = -0.38$<br>$p = 0.070$ | $r = -0.42$<br>$p = 0.040*$ | $r = 0.63$<br>$p = 9.6 \times 10^{-4}***$ | $r = 0.075$<br>$p = 0.73$ |

Note: EN: energy, PR: protein, LI: lipid, CA: carbohydrate, Na: sodium, WA: water, AS: ash, K:  $^{40}\text{K}$  (potassium-40), CS:  $^{137}\text{Cs}$  (cesium-137). ND (not determined) measurements were considered zero to obtain the values in this table. LI vs Cs:  $r = -0.48$ ,  $p = 0.022*$ , Na vs Cs:  $r = -0.53$ ,  $p = 0.0088**$ , and K vs Cs:  $r = -0.49$ ,  $p = 0.017*$  without Tomioka-1. \*:  $p < 0.05$ , \*\*:  $p < 0.01$ , \*\*\*:  $p < 0.001$ .

**Table S6. Pearson correlation coefficients and their associated  $p$ -values among nutrient contents,  $^{40}\text{K}$  and  $^{137}\text{Cs}$  radioactivity concentrations in *Oxalis* leaves, temperature, and ground radiation dose in the Tohoku group ( $n = 14$ ).**

|             | EN                                             | PR                               | LI                               | CA                                            | Na                              | WA                              | AS                           | K                          | Cs                        | Temperature                 |
|-------------|------------------------------------------------|----------------------------------|----------------------------------|-----------------------------------------------|---------------------------------|---------------------------------|------------------------------|----------------------------|---------------------------|-----------------------------|
| PR          | $r = 0.66$<br>$p = 0.011^*$                    |                                  |                                  |                                               |                                 |                                 |                              |                            |                           |                             |
| LI          | $r = 0.69$<br>$p = 0.0059^{**}$                | $r = 0.73$<br>$p = 0.0031^{**}$  |                                  |                                               |                                 |                                 |                              |                            |                           |                             |
| CA          | $r = 0.91$<br>$p = 4.7 \times 10^{-6}^{***}$   | $r = 0.33$<br>$p = 0.24$         | $r = 0.39$<br>$p = 0.17$         |                                               |                                 |                                 |                              |                            |                           |                             |
| Na          | $r = 0.35$<br>$p = 0.23$                       | $r = 0.54$<br>$p = 0.046^*$      | $r = 0.66$<br>$p = 0.0098^{**}$  | $r = 0.084$<br>$p = 0.78$                     |                                 |                                 |                              |                            |                           |                             |
| WA          | $r = -0.99$<br>$p = 4.1 \times 10^{-12}^{***}$ | $r = -0.66$<br>$p = 0.0097^{**}$ | $r = -0.68$<br>$p = 0.0072^{**}$ | $r = -0.91$<br>$p = 8.2 \times 10^{-6}^{***}$ | $r = -0.38$<br>$p = 0.18$       |                                 |                              |                            |                           |                             |
| AS          | $r = 0.33$<br>$p = 0.24$                       | $r = 0.43$<br>$p = 0.12$         | $r = 0.57$<br>$p = 0.033^*$      | $r = 0.13$<br>$p = 0.66$                      | $r = 0.68$<br>$p = 0.0071^{**}$ | $r = -0.43$<br>$p = 0.13$       |                              |                            |                           |                             |
| K           | $r = 0.13$<br>$p = 0.66$                       | $r = 0.38$<br>$p = 0.18$         | $r = 0.45$<br>$p = 0.10$         | $r = -0.092$<br>$p = 0.75$                    | $r = 0.74$<br>$p = 0.0026^{**}$ | $r = -0.15$<br>$p = 0.60$       | $r = 0.47$<br>$p = 0.093$    |                            |                           |                             |
| Cs          | $r = -0.23$<br>$p = 0.44$                      | $r = -0.47$<br>$p = 0.093$       | $r = -0.31$<br>$p = 0.28$        | $r = -0.056$<br>$p = 0.85$                    | $r = -0.30$<br>$p = 0.30$       | $r = 0.19$<br>$p = 0.52$        | $r = 0.083$<br>$p = 0.78$    | $r = -0.070$<br>$p = 0.81$ |                           |                             |
| Temperature | $r = -0.69$<br>$p = 0.0061^{**}$               | $r = -0.48$<br>$p = 0.081$       | $r = -0.69$<br>$p = 0.0062^{**}$ | $r = -0.56$<br>$p = 0.038^*$                  | $r = -0.63$<br>$p = 0.015^*$    | $r = 0.71$<br>$p = 0.0044^{**}$ | $r = -0.57$<br>$p = 0.034^*$ | $r = -0.37$<br>$p = 0.19$  | $r = 0.083$<br>$p = 0.78$ |                             |
| Ground dose | $r = -0.28$<br>$p = 0.32$                      | $r = -0.33$<br>$p = 0.24$        | $r = -0.30$<br>$p = 0.29$        | $r = -0.17$<br>$p = 0.56$                     | $r = -0.57$<br>$p = 0.032^*$    | $r = 0.29$<br>$p = 0.31$        | $r = -0.28$<br>$p = 0.32$    | $r = -0.28$<br>$p = 0.33$  | $r = 0.52$<br>$p = 0.058$ | $r = 0.54$<br>$p = 0.049^*$ |

Note: EN: energy, PR: protein, LI: lipid, CA: carbohydrate, Na: sodium, WA: water, AS: ash, K:  $^{40}\text{K}$  (potassium-40), Cs:  $^{137}\text{Cs}$  (cesium-137). ND (not determined) measurements were considered zero to obtain the values in this table. LI vs Cs:  $r = -0.39$ ,  $p = 0.19$ , Na vs Cs:  $r = -0.65$ ,  $p = 0.016^*$ , K vs Cs:  $r = -0.33$ ,  $p = 0.27$ , Cs vs Ground dose:  $r = 0.86$ ,  $p = 1.5 \times 10^{-4}^{***}$ , and Cs vs Temperature:  $r = 0.41$ ,  $p = 0.16$  without Tomioka-1. \*:  $p < 0.05$ , \*\*:  $p < 0.01$ , \*\*\*:  $p < 0.001$ .

**Table S7. Pearson correlation coefficients and their associated  $p$ -values among nutrient contents,  $^{40}\text{K}$  radioactivity concentration in *Oxalis* leaves, temperature, and ground radiation dose in the Niigata group ( $n = 5$ ).**

|             | EN                                         | PR                          | LI                                        | CA                           | Na                          | WA                         | AS                        | K                           | Temperature              |
|-------------|--------------------------------------------|-----------------------------|-------------------------------------------|------------------------------|-----------------------------|----------------------------|---------------------------|-----------------------------|--------------------------|
| PR          | $r = 0.61$<br>$p = 0.27$                   |                             |                                           |                              |                             |                            |                           |                             |                          |
| LI          | $r = 0.67$<br>$p = 0.21$                   | $r = 0.91$<br>$p = 0.029^*$ |                                           |                              |                             |                            |                           |                             |                          |
| CA          | $r = 0.89$<br>$p = 0.044^*$                | $r = 0.21$<br>$p = 0.73$    | $r = 0.26$<br>$p = 0.67$                  |                              |                             |                            |                           |                             |                          |
| Na          | $r = 0.68$<br>$p = 0.21$                   | $r = 0.93$<br>$p = 0.022^*$ | $r = 0.99$<br>$p = 4.8 \times 10^{-4}***$ | $r = 0.27$<br>$p = 0.66$     |                             |                            |                           |                             |                          |
| WA          | $r = -0.99$<br>$p = 6.7 \times 10^{-4}***$ | $r = -0.55$<br>$p = 0.34$   | $r = -0.59$<br>$p = 0.30$                 | $r = -0.93$<br>$p = 0.022^*$ | $r = -0.60$<br>$p = 0.29$   |                            |                           |                             |                          |
| AS          | $r = 0.88$<br>$p = 0.050^*$                | $r = 0.90$<br>$p = 0.038^*$ | $r = 0.93$<br>$p = 0.022^*$               | $r = 0.57$<br>$p = 0.32$     | $r = 0.93$<br>$p = 0.022^*$ | $r = -0.83$<br>$p = 0.082$ |                           |                             |                          |
| K           | $r = -0.014$<br>$p = 0.98$                 | $r = 0.50$<br>$p = 0.39$    | $r = 0.45$<br>$p = 0.44$                  | $r = -0.28$<br>$p = 0.65$    | $r = 0.39$<br>$p = 0.52$    | $r = 0.044$<br>$p = 0.94$  | $r = 0.35$<br>$p = 0.57$  |                             |                          |
| Temperature | $r = -0.65$<br>$p = 0.23$                  | $r = 0.12$<br>$p = 0.85$    | $r = -0.16$<br>$p = 0.80$                 | $r = -0.79$<br>$p = 0.11$    | $r = -0.14$<br>$p = 0.82$   | $r = 0.67$<br>$p = 0.22$   | $r = -0.32$<br>$p = 0.59$ | $r = 0.38$<br>$p = 0.53$    |                          |
| Ground dose | $r = 0.10$<br>$p = 0.87$                   | $r = 0.53$<br>$p = 0.35$    | $r = 0.34$<br>$p = 0.58$                  | $r = -0.074$<br>$p = 0.91$   | $r = 0.29$<br>$p = 0.63$    | $r = -0.11$<br>$p = 0.86$  | $r = 0.37$<br>$p = 0.54$  | $r = 0.90$<br>$p = 0.038^*$ | $r = 0.43$<br>$p = 0.47$ |

Note: EN: energy, PR: protein, LI: lipid, CA: carbohydrate, Na: sodium, WA: water, AS: ash, K:  $^{40}\text{K}$  (potassium-40). \*:  $p < 0.05$ , \*\*\*:  $p < 0.001$ .



**Table S8. Pearson correlation coefficients and their associated  $p$ -values among nutrient contents,  $^{40}\text{K}$  radioactivity concentration in *Oxalis* leaves, temperature, and ground radiation dose in the Kyushu group ( $n = 5$ ).**

|             | EN                               | PR                        | LI                         | CA                           | Na                          | WA                        | AS                          | K                        | Temperature               |
|-------------|----------------------------------|---------------------------|----------------------------|------------------------------|-----------------------------|---------------------------|-----------------------------|--------------------------|---------------------------|
| PR          | $r = 0.58$<br>$p = 0.31$         |                           |                            |                              |                             |                           |                             |                          |                           |
| LI          | $r = 0.85$<br>$p = 0.071$        | $r = 0.64$<br>$p = 0.24$  |                            |                              |                             |                           |                             |                          |                           |
| CA          | $r = 0.98$<br>$p = 0.0024^{**}$  | $r = 0.45$<br>$p = 0.45$  | $r = 0.76$<br>$p = 0.14$   |                              |                             |                           |                             |                          |                           |
| Na          | $r = 0.62$<br>$p = 0.26$         | $r = 0.32$<br>$p = 0.60$  | $r = 0.85$<br>$p = 0.071$  | $r = 0.56$<br>$p = 0.32$     |                             |                           |                             |                          |                           |
| WA          | $r = -0.96$<br>$p = 0.0089^{**}$ | $r = -0.68$<br>$p = 0.21$ | $r = -0.81$<br>$p = 0.096$ | $r = -0.93$<br>$p = 0.024^*$ | $r = -0.46$<br>$p = 0.44$   |                           |                             |                          |                           |
| AS          | $r = -0.74$<br>$p = 0.15$        | $r = -0.12$<br>$p = 0.85$ | $r = -0.56$<br>$p = 0.33$  | $r = -0.80$<br>$p = 0.11$    | $r = -0.71$<br>$p = 0.18$   | $r = 0.54$<br>$p = 0.35$  |                             |                          |                           |
| K           | $r = 0.11$<br>$p = 0.86$         | $r = 0.83$<br>$p = 0.084$ | $r = 0.19$<br>$p = 0.76$   | $r = -0.017$<br>$p = 0.98$   | $r = 0.057$<br>$p = 0.93$   | $r = -0.19$<br>$p = 0.76$ | $r = 0.12$<br>$p = 0.84$    |                          |                           |
| Temperature | $r = 0.53$<br>$p = 0.36$         | $r = 0.52$<br>$p = 0.37$  | $r = 0.73$<br>$p = 0.16$   | $r = 0.44$<br>$p = 0.45$     | $r = 0.91$<br>$p = 0.034^*$ | $r = -0.37$<br>$p = 0.54$ | $r = -0.65$<br>$p = 0.23$   | $r = 0.43$<br>$p = 0.47$ |                           |
| Ground dose | $r = 0.56$<br>$p = 0.33$         | $r = 0.83$<br>$p = 0.082$ | $r = 0.36$<br>$p = 0.55$   | $r = 0.50$<br>$p = 0.40$     | $r = -0.11$<br>$p = 0.86$   | $r = -0.73$<br>$p = 0.16$ | $r = -0.0049$<br>$p = 0.99$ | $r = 0.62$<br>$p = 0.27$ | $r = 0.038$<br>$p = 0.95$ |

Note: EN: energy, PR: protein, LI: lipid, CA: carbohydrate, Na: sodium, WA: water, AS: ash, K:  $^{40}\text{K}$  (potassium-40). \*:  $p < 0.05$ , \*\*:  $p < 0.01$ .

**Table S9. Coefficient of variation (CV) among nutrient contents and <sup>40</sup>K radioactivity concentration in *Oxalis* leaves.**

| Group    |      | EN     | PR     | LI     | CA     | Na    | WA      | AS     | K       |
|----------|------|--------|--------|--------|--------|-------|---------|--------|---------|
| 3 groups | SD   | 5.93   | 0.334  | 0.171  | 1.073  | 6.97  | 1.370   | 0.393  | 155.89  |
|          | Mean | 63.16  | 3.658  | 1.067  | 9.718  | 8.99  | 84.149  | 1.408  | 805.05  |
|          | CV   | 0.0939 | 0.0912 | 0.161  | 0.1104 | 0.776 | 0.01628 | 0.279  | 0.19365 |
| Tohoku   | SD   | 5.51   | 0.354  | 0.141  | 1.000  | 2.76  | 1.324   | 0.205  | 168.09  |
|          | Mean | 61.90  | 3.593  | 0.993  | 9.624  | 4.88  | 84.579  | 1.212  | 743.19  |
|          | CV   | 0.0889 | 0.0984 | 0.142  | 0.1039 | 0.565 | 0.01566 | 0.168  | 0.22618 |
| Niigata  | SD   | 5.33   | 0.207  | 0.190  | 1.013  | 7.42  | 1.252   | 0.102  | 27.11   |
|          | Mean | 66.80  | 3.950  | 1.200  | 10.060 | 18.90 | 83.350  | 1.440  | 932.23  |
|          | CV   | 0.0799 | 0.0525 | 0.158  | 0.1007 | 0.393 | 0.01502 | 0.0708 | 0.02908 |
| Kyushu   | SD   | 6.16   | 0.179  | 0.104  | 1.246  | 3.01  | 1.101   | 0.483  | 88.35   |
|          | Mean | 63.03  | 3.545  | 1.140  | 9.640  | 10.57 | 83.743  | 1.928  | 851.08  |
|          | CV   | 0.0977 | 0.0503 | 0.0913 | 0.1293 | 0.285 | 0.01315 | 0.251  | 0.1038  |

Note: EN: energy, PR: protein, LI: lipid, CA: carbohydrate, Na: sodium, WA: water, AS: ash, K: <sup>40</sup>K (potassium-40).

**Table S10. Shapiro-Wilk test for normality (*p*-values) using raw data, ratio transformed (rt) data, and centered log-ratio transformed (clr) data.**

|     | Group    | EN     | PR    | LI    | CA    | Na     | WA    | AS                   | K    | Cs     | Temperature | Ground dose |
|-----|----------|--------|-------|-------|-------|--------|-------|----------------------|------|--------|-------------|-------------|
| Raw | 3 groups | 0.12   | 0.49  | 0.13  | 0.15  | 0.0024 | 0.14  | 4.6×10 <sup>-4</sup> | 0.74 | -      | 0.24        | -           |
|     | Tohoku   | 0.0067 | 0.94  | 0.039 | 0.038 | 0.13   | 0.033 | 0.21                 | 0.20 | 0.0087 | 0.12        | 0.0032      |
|     | Niigata  | 0.98   | 0.048 | 0.47  | 0.38  | 0.56   | 0.94  | 0.81                 | 0.25 | -      | 0.45        | -           |
|     | Kyushu   | 0.91   | 0.66  | 0.98  | 1.0   | 0.020  | 0.79  | 0.041                | 0.67 | -      | 0.57        | -           |
| Rt  | 3 groups | -      | 0.79  | 0.31  | 0.98  | -      | 0.33  | 3.3×10 <sup>-5</sup> | -    | -      | -           | -           |
|     | Tohoku   | -      | 0.95  | 0.53  | 0.99  | -      | 0.20  | 0.30                 | -    | -      | -           | -           |
|     | Niigata  | -      | 0.38  | 0.82  | 0.046 | -      | 0.98  | 0.42                 | -    | -      | -           | -           |
|     | Kyushu   | -      | 0.71  | 0.46  | 0.53  | -      | 0.37  | 0.062                | -    | -      | -           | -           |
| Clr | 3 groups | -      | 0.67  | 0.47  | 0.86  | -      | 0.42  | 0.0012               | -    | -      | -           | -           |
|     | Tohoku   | -      | 0.90  | 0.6   | 1.0   | -      | 0.14  | 0.42                 | -    | -      | -           | -           |
|     | Niigata  | -      | 0.37  | 0.78  | 0.061 | -      | 0.96  | 0.47                 | -    | -      | -           | -           |
|     | Kyushu   | -      | 0.69  | 0.48  | 0.51  | -      | 0.35  | 0.080                | -    | -      | -           | -           |

Note: EN: energy, PR: protein, LI: lipid, CA: carbohydrate, Na: sodium, WA: water, AS: ash, K: <sup>40</sup>K (potassium-40), Cs: <sup>137</sup>Cs (cesium-137).

-: Not applicable. Cs: *p* = 0.0079 without Tomioka in the Tohoku Group.

**Table S11. Pearson correlation coefficients and their associated *p*-values between raw data and ratio transformed (rt) data and between raw data and centered log-ratio transformed (clr) data.**

|            |          | PR                          | LI                                         | CA                                        | WA                                        | AS                                         |
|------------|----------|-----------------------------|--------------------------------------------|-------------------------------------------|-------------------------------------------|--------------------------------------------|
| Raw vs Rt  | 3 groups | $r = 0.49$<br>$p = 0.015^*$ | $r = 0.91$<br>$p = 6.1 \times 10^{-10}***$ | $r = 0.69$<br>$p = 1.9 \times 10^{-4}***$ | $r = 0.83$<br>$p = 4.8 \times 10^{-7}***$ | $r = 0.97$<br>$p = 2.3 \times 10^{-15}***$ |
|            | Tohoku   | $r = 0.64$<br>$p = 0.013^*$ | $r = 0.90$<br>$p = 8.8 \times 10^{-6}***$  | $r = 0.69$<br>$p = 0.0066^{**}$           | $r = 0.86$<br>$p = 9.3 \times 10^{-5}***$ | $r = 0.93$<br>$p = 1.4 \times 10^{-6}***$  |
|            | Niigata  | $r = -0.097$<br>$p = 0.88$  | $r = 0.98$<br>$p = 0.0047^{**}$            | $r = 0.80$<br>$p = 0.11$                  | $r = 0.89$<br>$p = 0.045^*$               | $r = 0.91$<br>$p = 0.033^*$                |
|            | Kyushu   | $r = 0.66$<br>$p = 0.22$    | $r = 0.92$<br>$p = 0.026^*$                | $r = 0.96$<br>$p = 0.0085^{**}$           | $r = 0.68$<br>$p = 0.21$                  | $r = 0.99$<br>$p = 0.0021^{**}$            |
|            |          |                             |                                            |                                           |                                           |                                            |
| Raw vs Clr | 3 groups | $r = 0.49$<br>$p = 0.015^*$ | $r = 0.90$<br>$p = 1.3 \times 10^{-9}***$  | $r = 0.69$<br>$p = 1.9 \times 10^{-4}***$ | $r = 0.84$<br>$p = 2.8 \times 10^{-7}***$ | $r = 0.97$<br>$p = 1.1 \times 10^{-15}***$ |
|            | Tohoku   | $r = 0.65$<br>$p = 0.013^*$ | $r = 0.89$<br>$p = 1.6 \times 10^{-5}***$  | $r = 0.68$<br>$p = 0.0069^{**}$           | $r = 0.87$<br>$p = 5.8 \times 10^{-5}***$ | $r = 0.93$<br>$p = 1.1 \times 10^{-6}***$  |
|            | Niigata  | $r = -0.095$<br>$p = 0.88$  | $r = 0.97$<br>$p = 0.0075^{**}$            | $r = 0.80$<br>$p = 0.10$                  | $r = 0.89$<br>$p = 0.046^*$               | $r = 0.93$<br>$p = 0.022^*$                |
|            | Kyushu   | $r = 0.67$<br>$p = 0.22$    | $r = 0.92$<br>$p = 0.029^*$                | $r = 0.96$<br>$p = 0.0090^{**}$           | $r = 0.67$<br>$p = 0.22$                  | $r = 0.99$<br>$p = 0.0022^{**}$            |
|            |          |                             |                                            |                                           |                                           |                                            |

Note: PR: protein, LI: lipid, CA: carbohydrate, WA: water, AS: ash. \*:  $p < 0.05$ , \*\*:  $p < 0.01$ , \*\*\*:  $p < 0.001$ .
